# Supplementary material for: Bioluminescent magnetic nanoparticles as potential imaging agents for mammalian spermatozoa
Source: PubMed Central journal article supplement (PMC4794913; doi:10.1186/s12951-016-0168-y), 2016-03-17
Supplement: 12951_2016_168_MOESM1_ESM.pdf [file 12951_2016_168_MOESM1_ESM.pdf]

*Additional File*

**Bioluminescent Magnetic Nanoparticles as Potential Imaging Agents for Mammalian  
Spermatozoa**

*Erick S. Vasquez*<sup>1</sup>, *Jean M. Feugang*<sup>2,3\*</sup>, *Scott T. Willard*<sup>2,3,4</sup>, *Peter L. Ryan*<sup>2,3,5</sup>, *Keisha B. Walters*<sup>6\*</sup>

<sup>1</sup>Department of Chemical and Materials Engineering, University of Dayton, OH 45469

<sup>2</sup>Facility for Cellular and Organismal Imaging, Mississippi State University, MS 39762

<sup>3</sup>Department of Animal and Dairy Sciences, Mississippi State University, MS 39762

<sup>4</sup>Department of Biochemistry and Molecular Biology, Entomology and Plant Pathology, Mississippi State University, MS, 39762

<sup>5</sup>Department of Pathology and Population Medicine, College of Veterinary and Medicine, Mississippi State, MS, 39762

<sup>6</sup>Dave C. Swalm School of Chemical Engineering, Mississippi State University, MS 39762

Authors: [evasquez1@udayton.edu](mailto:evasquez1@udayton.edu), [swillard@cals.msstate.edu](mailto:swillard@cals.msstate.edu), and [ryan@provost.msstate.edu](mailto:ryan@provost.msstate.edu).

\*Corresponding authors: [jn181@ads.msstate.edu](mailto:jn181@ads.msstate.edu) and [kwalters@che.msstate.edu](mailto:kwalters@che.msstate.edu)

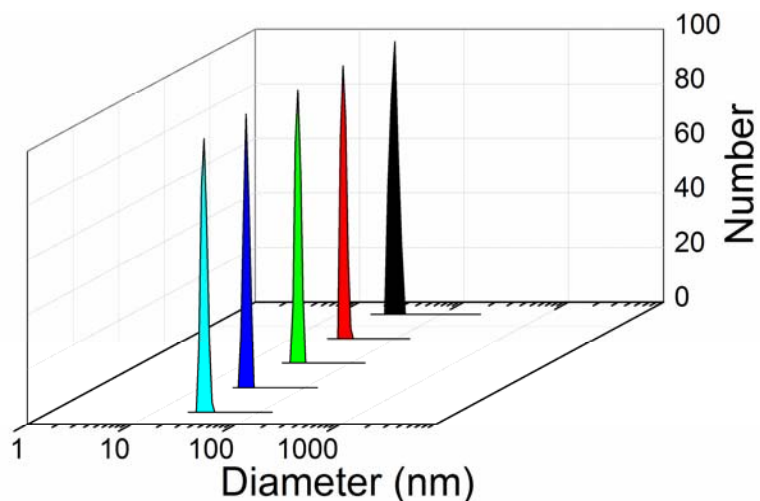

**Figure S1.** Hydrodynamic diameter for in-house synthesized CA-MNPs, as measured by DLS number intensity (5 replicates). An average diameter of  $31.5 \pm 1.5$  nm was measured for the in-house synthesized CA-MNPs.

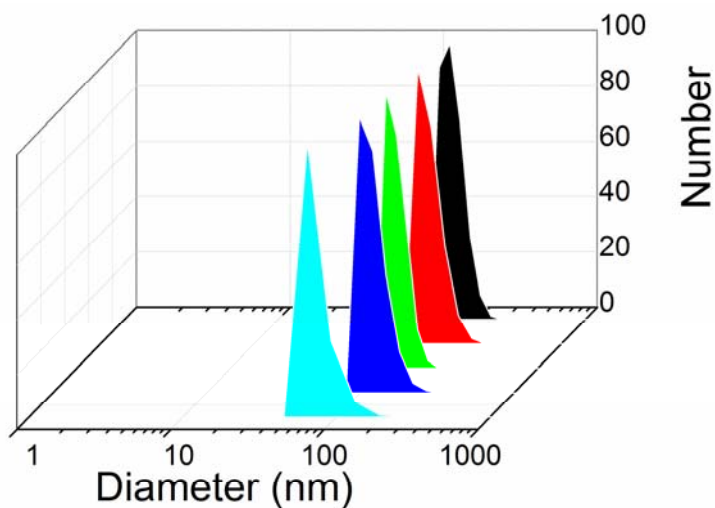

**Figure S2.** Hydrodynamic diameter for Luc+MNP, as measured by DLS number intensity (5 replicates). After luciferase addition, the number intensity particle diameter measured increased as compared to CA-MNPs. The larger particle diameter matches the size increases observed by TEM, and confirms that luciferase is bound onto the CA-MNP. Future studies will examine the optimum ratio between luciferase and CA-MNPs, the mechanisms of the adsorption process(es), and the resultant Luc+MNP complex structures.

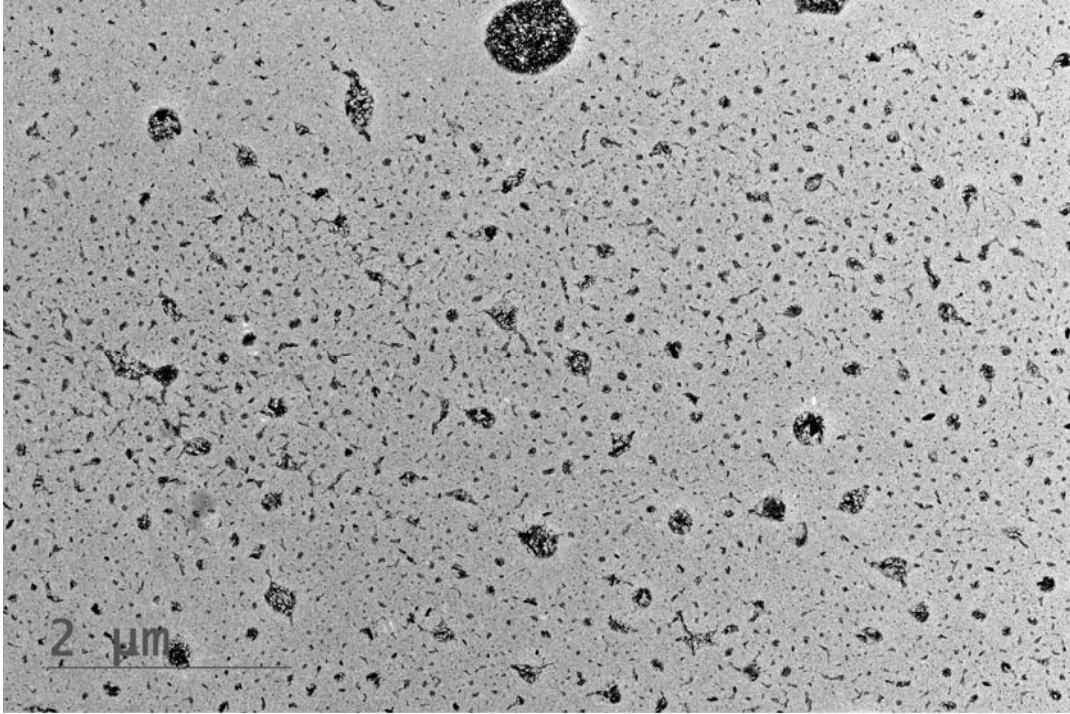

**Figure S3.** Magnetic nanoparticles (Luc+MNPs) aggregated under the presence of PBS solutions and in a conventional TEM characterization where like in the confocal, epifluorescence, and atomic/magnetic force microscopy results dried samples were used for imaging Luc+MNPs interacting with spermatozoa with the drying process contributing to the aggregation observed.

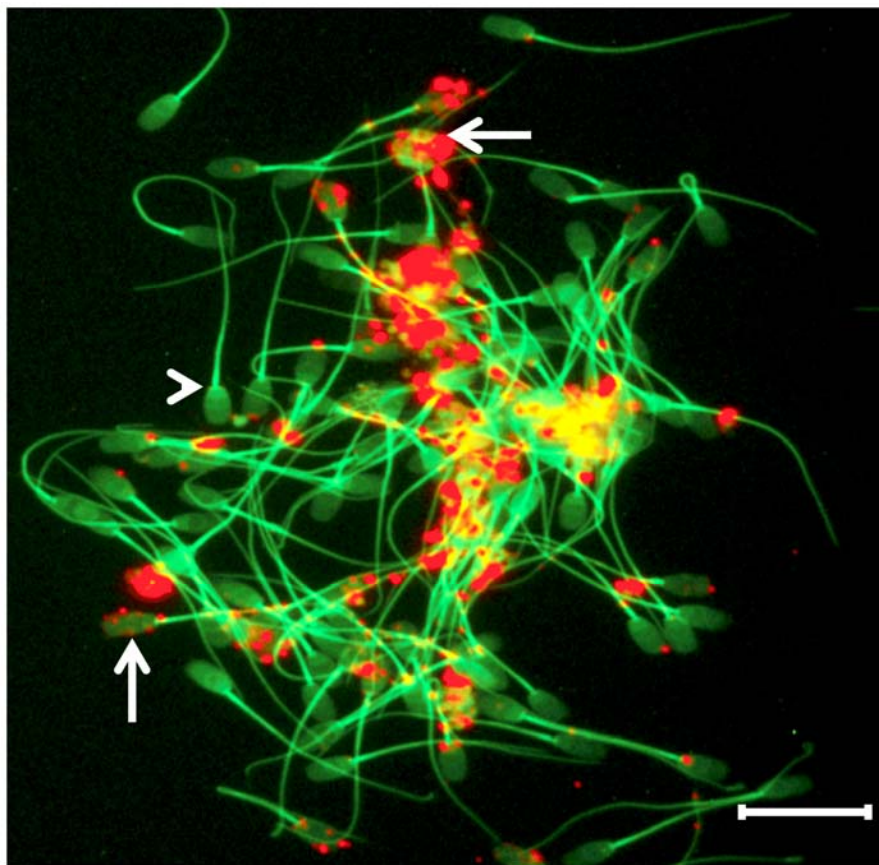

**Figure S4.** QDs nanoparticles combined with spermatozoa showed binding at different sites on the cells (arrows) as well as unlabeled cells (arrow heads). Scale bar = 10 micrometers. The QD associated with spermatozoa are attached at multiple and different sites on the cell; examples are marked with arrows. Note that not all spermatozoa were labeled using the QD method; examples of these unlabeled cells are marked with arrow heads.

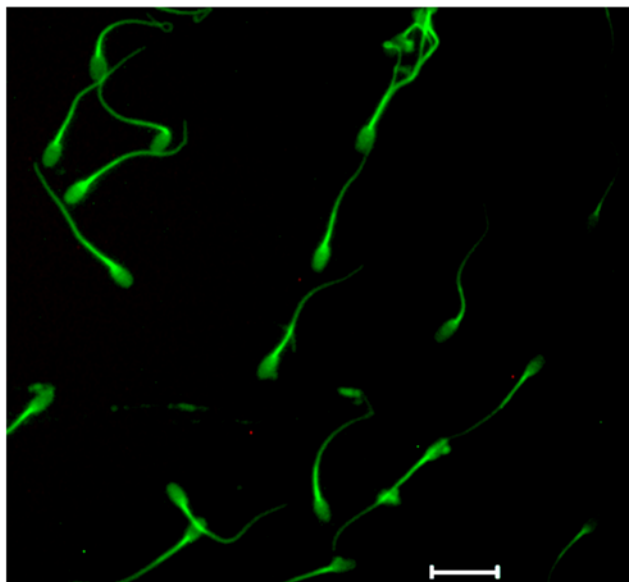

**Figure S5.** Neat spermatozoa observed with an epifluorescence microscope. Scale bar = 10 microns. Neat spermatozoa were characterized to demonstrate that coelenterazine and PBS neither contain nor cause the development of the observed round nanoscale structures in the CA-MNPs and Luc+MNP samples (Figs. 4 and 5).
